# Supplementary material
Source: HighWire-hosted journal article supplement (http://www.cmaj.ca/highwire/filestream/59137/field_highwire_adjunct_files/4/diet-salvado-3-at.pdf)
Supplement: diet-salvado-3-at.pdf [file diet-salvado-3-at.pdf]

**Appendix 3: Adherence to Mediterranean diet among study participants without metabolic syndrome at baseline (as supplied by the authors)**

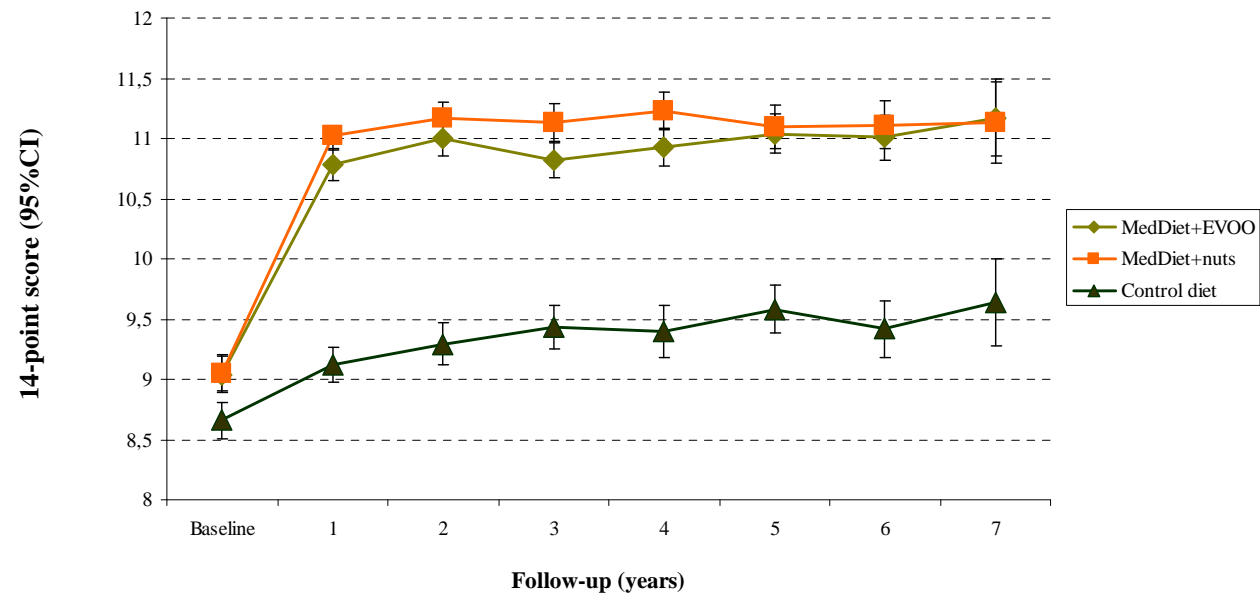

|                     | Baseline | 1 year | 2 years | 3 years | 4 years | 5 years | 6 years | 7 years |
|---------------------|----------|--------|---------|---------|---------|---------|---------|---------|
| <b>MedDiet+EVOO</b> | 663      | 640    | 601     | 576     | 461     | 403     | 300     | 119     |
| <b>MedDiet+nuts</b> | 662      | 625    | 571     | 534     | 422     | 389     | 291     | 113     |
| <b>Control diet</b> | 594      | 491    | 404     | 371     | 288     | 286     | 202     | 86      |

Appendix to: Mediterranean diets and metabolic syndrome status in the PREDIMED randomized trial. Babio N, ToledoE, Estruch R, et al. *CMAJ* 2014. DOI: 10.1503/cmaj.140764. Copyright © 2014 The Author(s) or their employer(s). To receive this resource in an accessible format, please contact us at [cmajgroup@cmaj.ca](mailto:cmajgroup@cmaj.ca).
